# Supplementary material for: The translocator protein gene is associated with endogenous pain modulation and the balance between glutamate and γ-aminobutyric acid in fibromyalgia and healthy subjects: a multimodal neuroimaging study
Source: PubMed Central journal article supplement (PMC8756347; doi:10.1097/j.pain.0000000000002309), 2021-04-09
Supplement: jop-163-0274-s001.pdf [file jop-163-0274-s001.pdf]

**Supplementary Table 1.**

| <b>Site</b>                                    | <b>size</b> | <b>t-value</b> | <b>FWE</b> | <b>x</b> | <b>y</b> | <b>z</b> |
|------------------------------------------------|-------------|----------------|------------|----------|----------|----------|
| <b>R Parietal Operculum</b>                    | 3262        | 20.77          | < 0.001    | 54       | -28      | 22       |
| <b>R Central Operculum</b>                     |             | 15.15          |            | 56       | 2        | 4        |
| <b>R Insular Cortex</b>                        |             | 13.80          |            | 34       | -20      | 14       |
| <b>R Postcentral Gyrus</b>                     | 1120        | 16.60          | < 0.001    | 12       | -38      | 68       |
| <b>R Precentral Gyrus</b>                      |             | 12.64          |            | 4        | -14      | 64       |
| <b>L Parietal Operculum</b>                    | 2228        | 14.57          | < 0.001    | -52      | -34      | 20       |
| <b>L Central Operculum</b>                     |             | 12.58          |            | -52      | -2       | 2        |
| <b>L Postcentral Gyrus/Supramarginal Gyrus</b> |             | 12.29          |            | -62      | -24      | 24       |
| <b>R Anterior Cingulate Cortex</b>             | 403         | 8.19           | < 0.001    | 6        | -8       | 42       |
| <b>L Paracingulate Gyrus</b>                   |             | 7.14           |            | -6       | 12       | 46       |
| <b>R Anterior Cingulate Cortex</b>             |             | 6.29           |            | 4        | 2        | 44       |
| <b>R Putamen</b>                               | 31          | 6.35           | 0.001      | 20       | 12       | -8       |

Anatomical site, cluster size (minimum size of 10 voxels), maximum t-value, p-values per cluster corrected for multiple comparisons using a family-wise error (FWE) rate approach ( $p < 0.05$ ) and Montreal Neurological Institute-coordinates of the local maxima for the main effect of P30 pooled across subjects. L, left; R, right.

**Supplementary Table 2. Spearman's correlations between P30 BOLD signal and glutamate as well as between P30 BOLD signal and GABA in rACC and thalamus.**

|                 | rACC glutamate - BOLD |                |          |                | THALAMUS glutamate - BOLD |                |          |                | rACC GABA - BOLD |                |          |                | THALAMUS GABA - BOLD |                |                   |                |        |
|-----------------|-----------------------|----------------|----------|----------------|---------------------------|----------------|----------|----------------|------------------|----------------|----------|----------------|----------------------|----------------|-------------------|----------------|--------|
|                 | Absolute              |                | Relative |                | Absolute                  |                | Relative |                | Absolute         |                | Relative |                | Absolute             |                | Relative compound |                |        |
|                 | compound              | concentrations | compound | concentrations | compound                  | concentrations | compound | concentrations | compound         | concentrations | compound | concentrations | compound             | concentrations | compound          | concentrations |        |
|                 | N                     |                |          |                |                           |                |          |                |                  |                |          |                |                      |                |                   |                |        |
|                 | (rACC/thalamus)       |                | r        | p-value        | r                         | p-value        | r        | p-value        | r                | p-value        | r        | p-value        | r                    | p-value        | r                 | p-value        |        |
| <b>ACROSS</b>   |                       |                |          |                |                           |                |          |                |                  |                |          |                |                      |                |                   |                |        |
|                 | 94/98                 | -0.0796        | 0.4460   | -0.0092        | 0.9299                    | -0.0872        | 0.3933   | -0.0116        | 0.9096           | 0.0698         | 0.5041   | 0.0810         | 0.4376               | -0.0669        | 0.5129            | -0.0464        | 0.6500 |
| <b>SUBJECTS</b> |                       |                |          |                |                           |                |          |                |                  |                |          |                |                      |                |                   |                |        |
| <b>FM</b>       | 61/64                 | -0.2491        | 0.0531   | -0.1574        | 0.2250                    | -0.1099        | 0.3864   | 0.0903         | 0.4768           | 0.1455         | 0.2631   | 0.1772         | 0.1719               | -0.0008        | 0.9951            | 0.0027         | 0.9831 |
| <b>HC</b>       | 33/34                 | 0.1654         | 0.3560   | 0.2814         | 0.1126                    | -0.0918        | 0.6042   | 0.1545         | 0.3816           | -0.0003        | 0.9985   | -0.0010        | 0.9956               | -0.2404        | 0.1709            | -0.1691        | 0.3389 |
| <b>HAB</b>      | 55/55                 | -0.0203        | 0.8830   | 0.0742         | 0.5891                    | -0.1670        | 0.2231   | -0.0716        | 0.6036           | 0.1029         | 0.4549   | 0.1305         | 0.3423               | -0.1633        | 0.2336            | -0.1758        | 0.2155 |
| <b>MLAB</b>     | 39/43                 | -0.1630        | 0.3204   | -0.1180        | 0.4729                    | -0.0190        | 0.9036   | 0.0616         | 0.6938           | 0.0009         | 0.9956   | -0.0078        | 0.9624               | 0.0743         | 0.6358            | 0.0947         | 0.5457 |

FM, fibromyalgia; HC, healthy controls; HAB, high affinity binders; MLAB, mixed/low affinity binders; rACC, rostral anterior cingulate cortex; BOLD, blood oxygen level-dependent; GABA,  $\gamma$ -aminobutyric acid.
